# Supplementary material for: Inverse Association between the Existence of CRISPR/Cas Systems with Antibiotic Resistance, Extended Spectrum β-Lactamase and Carbapenemase Production in Multidrug, Extensive Drug and Pandrug-Resistant Klebsiella pneumoniae
Source: MDPI journal article supplement (doi:10.3390/antibiotics12060980), 2023-05-29
Supplement: s1 [file s1]

**Figure S1.** Gel images showing CRISPR and Cas elements in *Klebsiella pneumoniae* isolates.

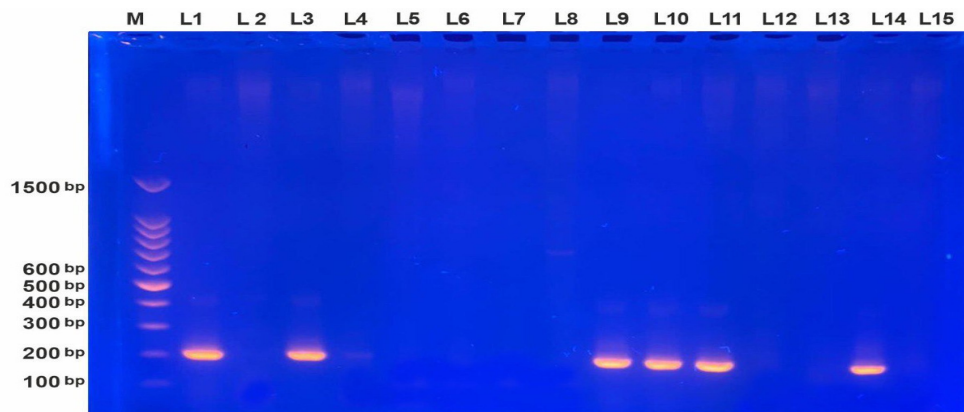

**Figure S1.A:** PCR product of CAS1 genes (208 bp) via PCR. M indicates the DNA marker (100 bp). The numeric characters represent the sequential number of different *Klebsiella pneumoniae* isolates.

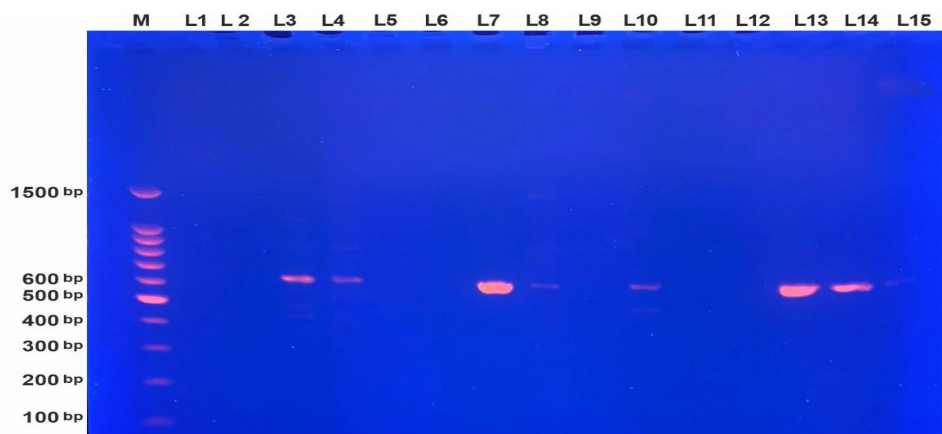

**Figure S1.B:** PCR product of CAS3 genes (620 bp) via PCR. M indicates the DNA marker (100 bp). The numeric characters represent the sequential number of different *Klebsiella pneumoniae* isolates.

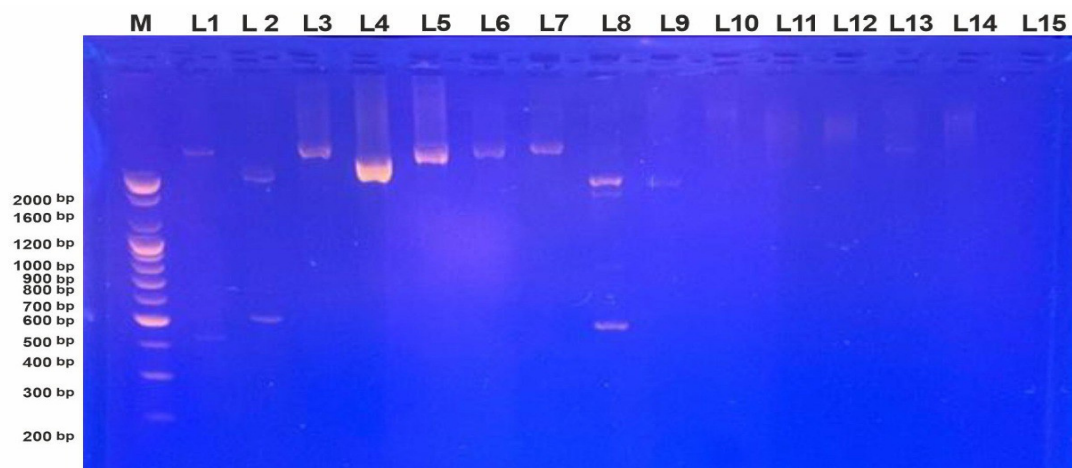

**Figure S1.C: PCR product of CRISPR1 genes via PCR. M indicates the DNA marker (100 bp). The numeric characters represent the sequential number of different *Klebsiella pneumoniae* isolates that carry the CRISPR1 gene.**

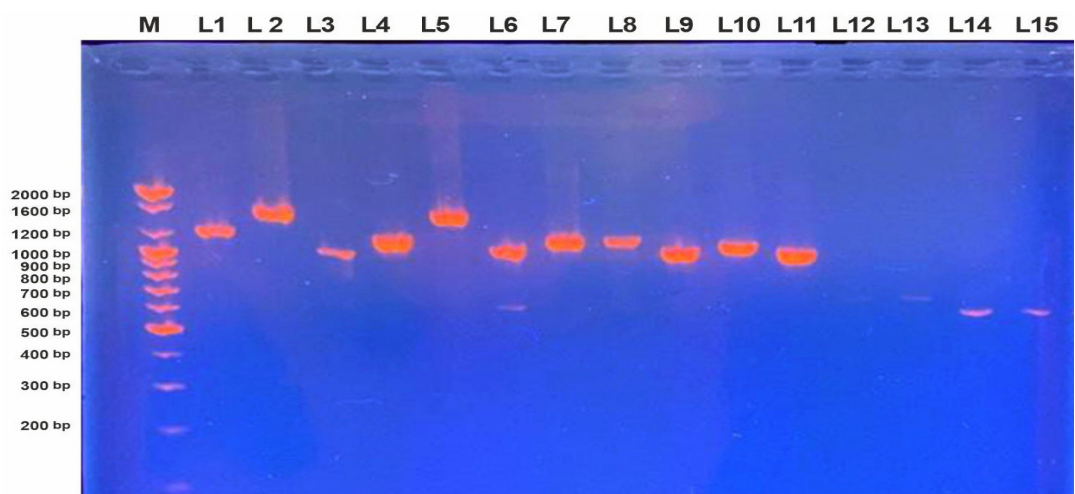

**Figure S1.D: PCR product of CRISPR2 genes via PCR. M indicates the DNA marker (100 bp). The numeric characters represent the sequential number of different *Klebsiella pneumoniae* isolates that carry the CRISPR2 gene.**

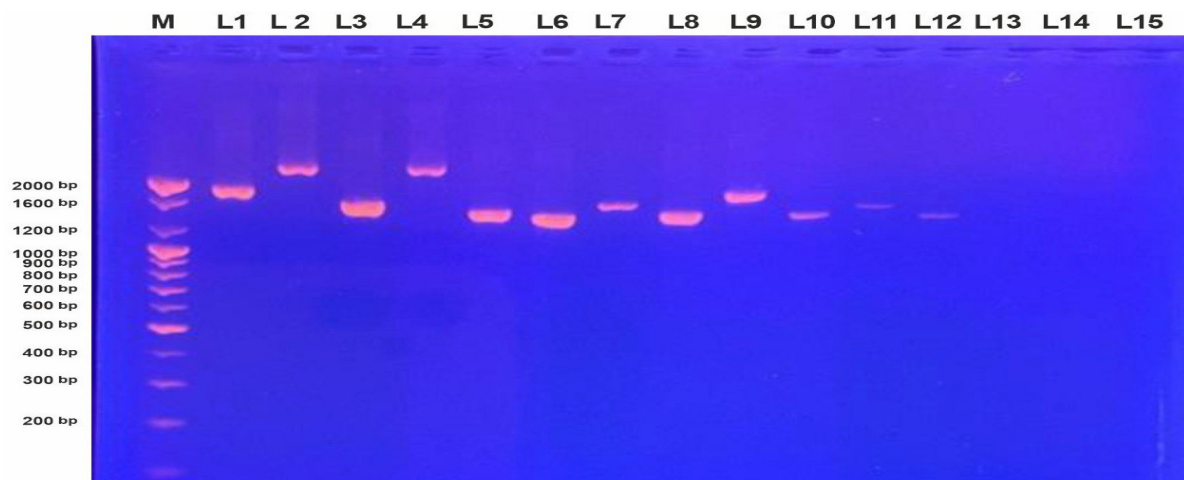

**Figure S1.E: PCR product of CRISPR3 genes via PCR. M indicates the DNA marker (100 bp). The numeric characters represent the sequential number of different *Klebsiella pneumoniae* isolates that carry the CRISPR3 gene.**
