# Supplementary material for: Inverse Association between the Existence of CRISPR/Cas Systems with Antibiotic Resistance, Extended Spectrum β-Lactamase and Carbapenemase Production in Multidrug, Extensive Drug and Pandrug-Resistant Klebsiella pneumoniae
Source: MDPI journal article supplement (doi:10.3390/antibiotics12060980), 2023-05-29
Supplement: s1 [file s1]

**Table S1. The distribution of CRISPR and Cas elements and systems in *Klebsiella pneumoniae* isolates.**

**Table S1.A The distribution of CRISPR and Cas elements in study isolates of *Klebsiella pneumoniae* (Sensitive VS Resistant)**

| Sample status            | Crispr1   | Crispr2   | Crispr3   | Cas1      | Cas3      | P. value |
|--------------------------|-----------|-----------|-----------|-----------|-----------|----------|
| <b>Sensitive No. (%)</b> | 10(71.43) | 2(14.29)  | 3(21.43)  | 10(71.43) | 5(35.71)  | 0.013    |
| <b>Resistant No. (%)</b> | 17(19.77) | 32(37.2)  | 16(18.6)  | 27(31.40) | 37(43.02) |          |
| <b>Total</b>             | 27 (27.0) | 34 (34.0) | 19 (19.0) | 37 (37.0) | 42 (42.0) |          |

**N.S:** No significant differences ( $p > 0.05$ ), (\*) significant differences ( $p < 0.05$ ), (\*\*) highly significant differences ( $p < 0.01$ ). The Chi squared test is statistically used to compare between two proportions.

**Table S1.B The distribution of CRISPR and Cas elements among resistant isolates (ESBL VS metallo  $\beta$ -lactamase producers)**

| Status                                              | Crispr1   | Crispr2   | Crispr3  | Cas1      | Cas3      | P. value |
|-----------------------------------------------------|-----------|-----------|----------|-----------|-----------|----------|
| <b>ESBL No. (%)</b>                                 | 14(19.71) | 25(35.21) | 13(18.3) | 23(32.39) | 27(38.02) | 0.806    |
| <b>Metallo <math>\beta</math>-lactamase No. (%)</b> | 3(20.0)   | 7(46.67)  | 3(20.0)  | 4(26.67)  | 10(66.67) |          |
| <b>Total</b>                                        | 17(19.77) | 32(37.21) | 16(18.6) | 27 (31.4) | 37(43.02) |          |

**\*ESBL** refers to Extended Spectrum of  $\beta$ -Lactamase enzyme. **N.S:** No significant differences ( $p > 0.05$ ), (\*) significant differences ( $p < 0.05$ ), (\*\*) highly significant differences ( $p < 0.01$ ). The Chi squared test is statistically used to compare between two proportions.

**Table S1.C The occurrence of the CRISPR /Cas system in 100 *Klebsiella pneumoniae* isolates (Sensitive VS Resistant)**

| Sample status               | Crispr1-Cas | Crispr2-Cas | Crispr3-Cas | Crispr-Cas | P value |
|-----------------------------|-------------|-------------|-------------|------------|---------|
| <b>Sensitive</b><br>No. (%) | 6 (42.86)   | 1 (7.14)    | 1 (7.14)    | 8 (57.14)  | 0.023   |
| <b>Resistant</b><br>No. (%) | 7 (8.14)    | 23 (26.74)  | 16 (18.6)   | 24 (29.07) | 0.011   |
| <b>Total</b>                | 13 (13.0)   | 24 (24.0)   | 17 (17.0)   | 32 (32.0)  |         |

N.S: No significant differences ( $p>0.05$ ), significant differences ( $p < 0.05$ ), highly significant differences ( $p<0.01$ ). The Chi-squared test is statistically used to compare between two proportions.

**Table S1.D The occurrence of the CRISPR /Cas system among antimicrobial-resistant isolates (ESBL VS metallo  $\beta$ -lactamase producer) of *Klebsiella pneumoniae*.**

| Sample status                               | Crispr1-Cas | Crispr2-Cas | Crispr3-Cas | Crispr-Cas | P. Value |
|---------------------------------------------|-------------|-------------|-------------|------------|----------|
| <b>ESBL</b><br>No. (%)                      | 6(8.45)     | 19(26.76)   | 13(18.31)   | 20(28.17)  | 0.026    |
| <b>Metallo <math>\beta</math>-lactamase</b> | 1(6.67)     | 4(26.67)    | 3(20.0)     | 4(26.67)   | 0.572    |
| <b>Total</b>                                | 7 (8.14)    | 23 (26.7)   | 16 (18.6)   | 24 (27.9)  |          |

\*ESBL refers to Extended Spectrum of  $\beta$ -Lactamase enzyme. N.S: No significant differences ( $p>0.05$ ), significant differences ( $p < 0.05$ ), highly significant differences ( $p < 0.01$ ). The Chi-squared test is statistically used to compare between two proportions.
